# Supplementary material for: Important Metabolites in Maintaining Folate Cycle, Homocysteine, and Polyamine Metabolism Associated with Ranibizumab Treatment in Cultured Human Tenon’s Fibroblasts
Source: MDPI journal article supplement (doi:10.3390/biom9060243), 2019-06-22
Supplement: s1 [file s1]

**Supplementary 1:** Immunostaining Images Of HTF By Vimentin And DAPI. A: Cytoplasm Stained In Green (Vimentin). B: Nucleus Stained In Blue (DAPI). C: Merge. D: Monochrome. (20x magnification)

**Supplementary 2:** Chromatogram of LC MS Q-TOF Analysis

**Supplementary 3:** Hierarchical clustering view showing differences between control HTF groups to ranibizumab-treated HTF group.

**Supplementary 4:** Principle component analysis (PCA) of metabolites from HTF control groups and ranibizumab-treated HTF group.
