# Supplementary figures and images for: Important Metabolites in Maintaining Folate Cycle, Homocysteine, and Polyamine Metabolism Associated with Ranibizumab Treatment in Cultured Human Tenon’s Fibroblasts
Source: MDPI journal article supplement (doi:10.3390/biom9060243), 2019-06-22

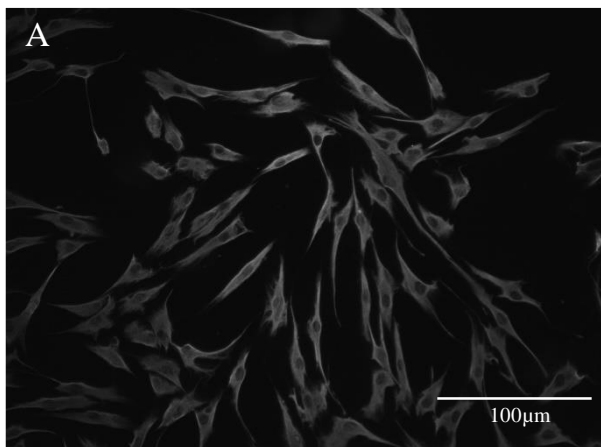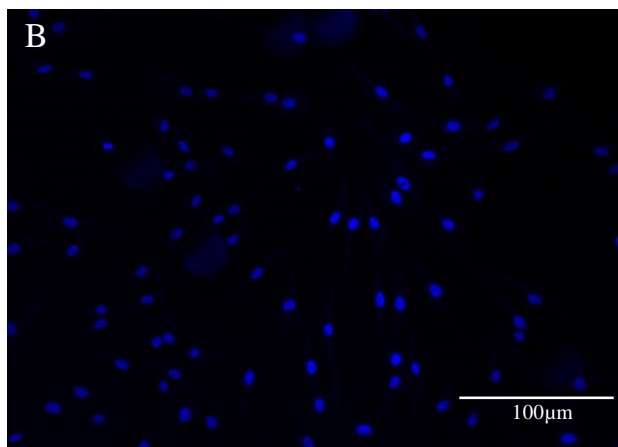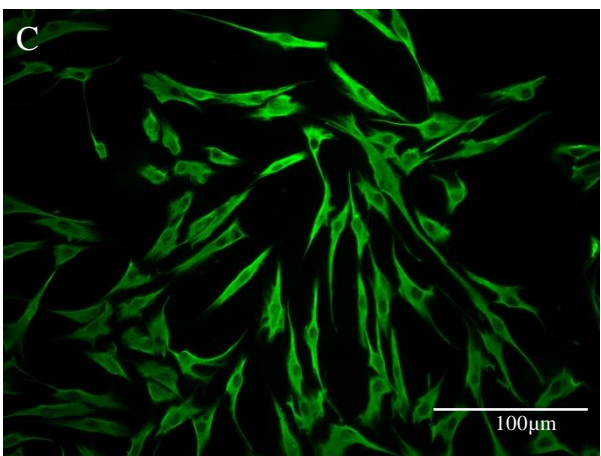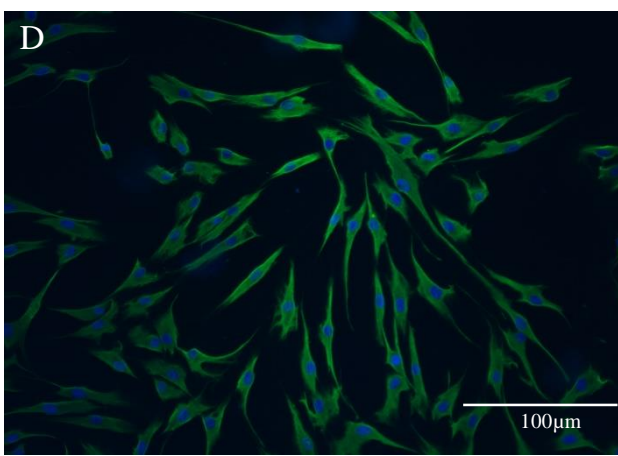

Supplement: s1 [file s1]
